# Supplementary material for: Disseminated intravascular coagulation as a complication of bursitis: angiogenesis and repetitive bleeding as potential factors for disseminated intravascular coagulation: a case report
Source: J Med Case Rep. 2021 Apr 10;15:155. doi: 10.1186/s13256-021-02773-x (PMC8035724; doi:10.1186/s13256-021-02773-x)
Supplement: Supplementary file 1 — Additional file 1: Table S1. Blood examination results. Blood examination at postoperation day (POD)-2 indicated DIC with a fibrinolytic phenotype, which ameliorated after the operation [file 13256_2021_2773_MOESM1_ESM.xlsx]

## Sheet: Sheet1
	Table 1. Transition of hematologic test data
		Pre Operation		Post Operation
		POD -40	POD -2	POD 0	POD 1	POD 2
	WBC (x10^3/μL)	5	4.8	5.8	9.4	7.9
	RBC (x10^6/μL)	3.38	3.22	3.23	4.02	4.08
	Hb (g/dL)	10.2	9.6	9.7	11.9	12.2
	Plt (x10^3/μL)	130	53	63	129	173
	PT (%)	97.7	68	67.6	90.2	106.6
	PT-INR	1	1.17	1.17	1.03	0.96
	APTT (seconds)	23.7	24.5	31	22.1	21.2
	Fibrinogen (mg/dL)	195	87	182	229	299
	AT III (%)	-	98.4	69.5	84.1	100.7
	FDP (μg/mL)	90.4	201.1	23.3	8.6	4.8
	D-dimer (μg/mL)	42.9	115.2	10.8	3.4	1.8
	TAT (μg/L)	-	56.8	41.9	3.7	3.3
	PIC (μg/mL)	-	6.9	1.7	0.8	1
	Factor XIII (%)	-	26.3	47.4	46.8	47.8
	*POD, post operation day; WBC, white blood cells; RBC, red blood cells; Hb, hemoglobin; Plt, platelet; PT, prothrombin time; APTT, activated partial thromboplastin time; ATIII, antithrombin 3 ; FDP, fibrin/fibrinogen degradation products; TAT, thrombin-antithrombin complex; PIC, plasmin-α2 plasmin inhibitor complex
